# Supplementary material
Source: bioRxiv or medRxiv preprint supplement (https://www.biorxiv.org/highwire/filestream/2558/field_highwire_adjunct_files/0/010124-1.pdf)
Supplement: Supplementary file [file 010124-1.pdf]

# State-dependent information processing in gene regulatory networks

## Supplementary Material

Marçal Gabalda-Sagarra<sup>1</sup>, Lucas Carey<sup>1</sup>, and Jordi Garcia-Ojalvo<sup>1</sup>

<sup>1</sup>Department of Experimental and Health Sciences, Pompeu Fabra University, Barcelona, Spain

October 3, 2014

Table 1: Number of nodes of the Ecocyc core that receive directly the input signal for each kind of stress circuit. Different subjective levels of certainty are included (the higher the threshold value, the more restrictive is the assignation of nodes to each group).

| <b>Stress signal</b> | <b>Certainty threshold</b> |          |          |          |          |
|----------------------|----------------------------|----------|----------|----------|----------|
|                      | <b>1</b>                   | <b>2</b> | <b>3</b> | <b>4</b> | <b>5</b> |
| Any stress           | 58                         | 57       | 52       | 43       | 29       |
| Antibiotics          | 16                         | 10       | 6        | 3        | 1        |
| Anaerobiosis         | 6                          | 6        | 5        | 3        | 2        |
| Osmotic stress       | 13                         | 13       | 7        | 6        | 3        |
| Extreme pH           | 15                         | 14       | 10       | 7        | 1        |
| Oxidative stress     | 17                         | 17       | 13       | 9        | 5        |
| Starvation           | 30                         | 29       | 25       | 18       | 10       |
| Temperature          | 8                          | 8        | 7        | 6        | 5        |

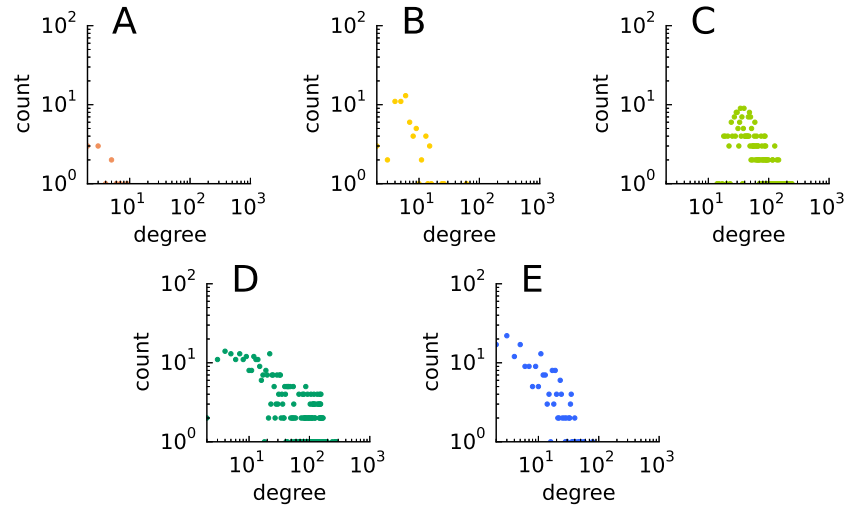

Supplementary Figure 1: Degree distribution of the cores of the analysed gene regulatory networks on a log-log scale. Each plot corresponds to one of the networks: DBTBS (A), Ecocyc (B), YEASTRACT (C), modENCODE (D) and ENCODE (E).

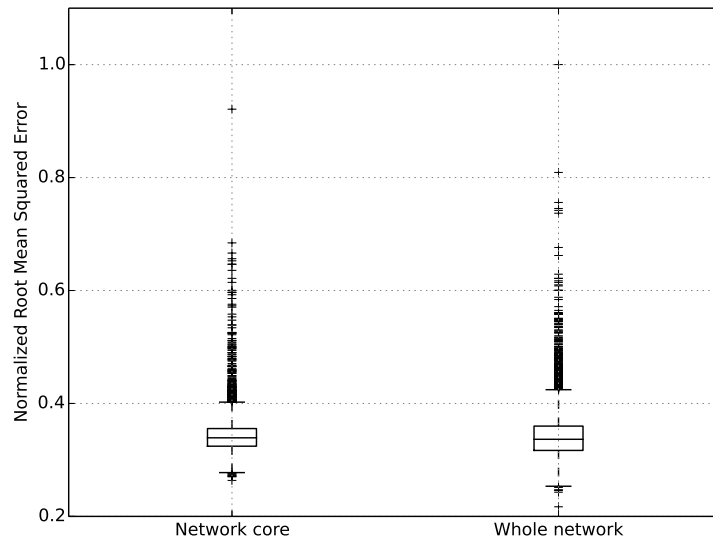

Supplementary Figure 2: Comparative results of 10000 trials of the 10th order NARMA prediction task using the whole Ecocyc network and only its recurrent core as reservoir.
